# Supplementary material for: Altered pulmonary blood volume distribution as a biomarker for predicting outcomes in COVID-19 disease
Source: PubMed Central journal article supplement — Eur Respir J. 2021 Sep 16;58(3):2004133. doi: 10.1183/13993003.04133-2020 (PMC7908189; doi:10.1183/13993003.04133-2020), 2021-09-16
Supplement: ERJ-04133-2020.SUPPLEMENT.pdf [file ERJ-04133-2020.SUPPLEMENT.pdf]

| CT Findings                 | COVID-19 Positive | COVID-19 Negative | p-value |
|-----------------------------|-------------------|-------------------|---------|
| COVID-19/atypical pneumonia | 23.7 (7.3)        | 27.2 (10.3)       | 0.02    |
| Non COVID-19 pneumonia      | 26.2 (5.1)        | 28.4 (9.9)        | 0.32    |
| Pulmonary edema             | 26.8 (4.3)        | 25.7 (4.7)        | 0.88    |
| Pulmonary embolism          | 25.1 (7.5)        | 30.8 (11.5)       | 0.35    |
| Emphysema                   | 26.8 (6.8)        | 28.7 (8.4)        | 0.35    |
| Tumor                       | 37.7 (N/A)        | 26.7 (5.3)        | 0.19    |
| Interstitial lung disease   | N/A               | 33.2 (N/A)        | N/A     |
| Aspiration/Bronchitis       | 54.7 (N/A)        | 27.1 (8.7)        | 0.12    |
| Pleural effusion            | 21.9 (N/A)        | 29.2 (9.5)        | 0.17    |
| Pulmonary infarct           | N/A               | 39.9 (13.1)       | N/A     |
| Normal                      | 28.6 (5.2)        | 30.5 (9.9)        | 0.21    |

Table S1. BV5% stratified by COVID status and CT findings. Findings reported as mean (standard deviation)

The equation for the model computing probability of death or intubation of COVID-19 positive patients as a function of age and BV5% was:

$$P = \frac{1}{1 + e^{-(0.03 \times A - 0.06 \times B - 1.70)}}$$

A = age (years) and B = BV5% (percent)
